# Supplementary material
Source: PubMed Central journal article supplement (PMC2886009)
Supplement: NIHMS205208-supplement-Arrays_1.pdf [file NIHMS205208-supplement-Arrays_1.pdf]

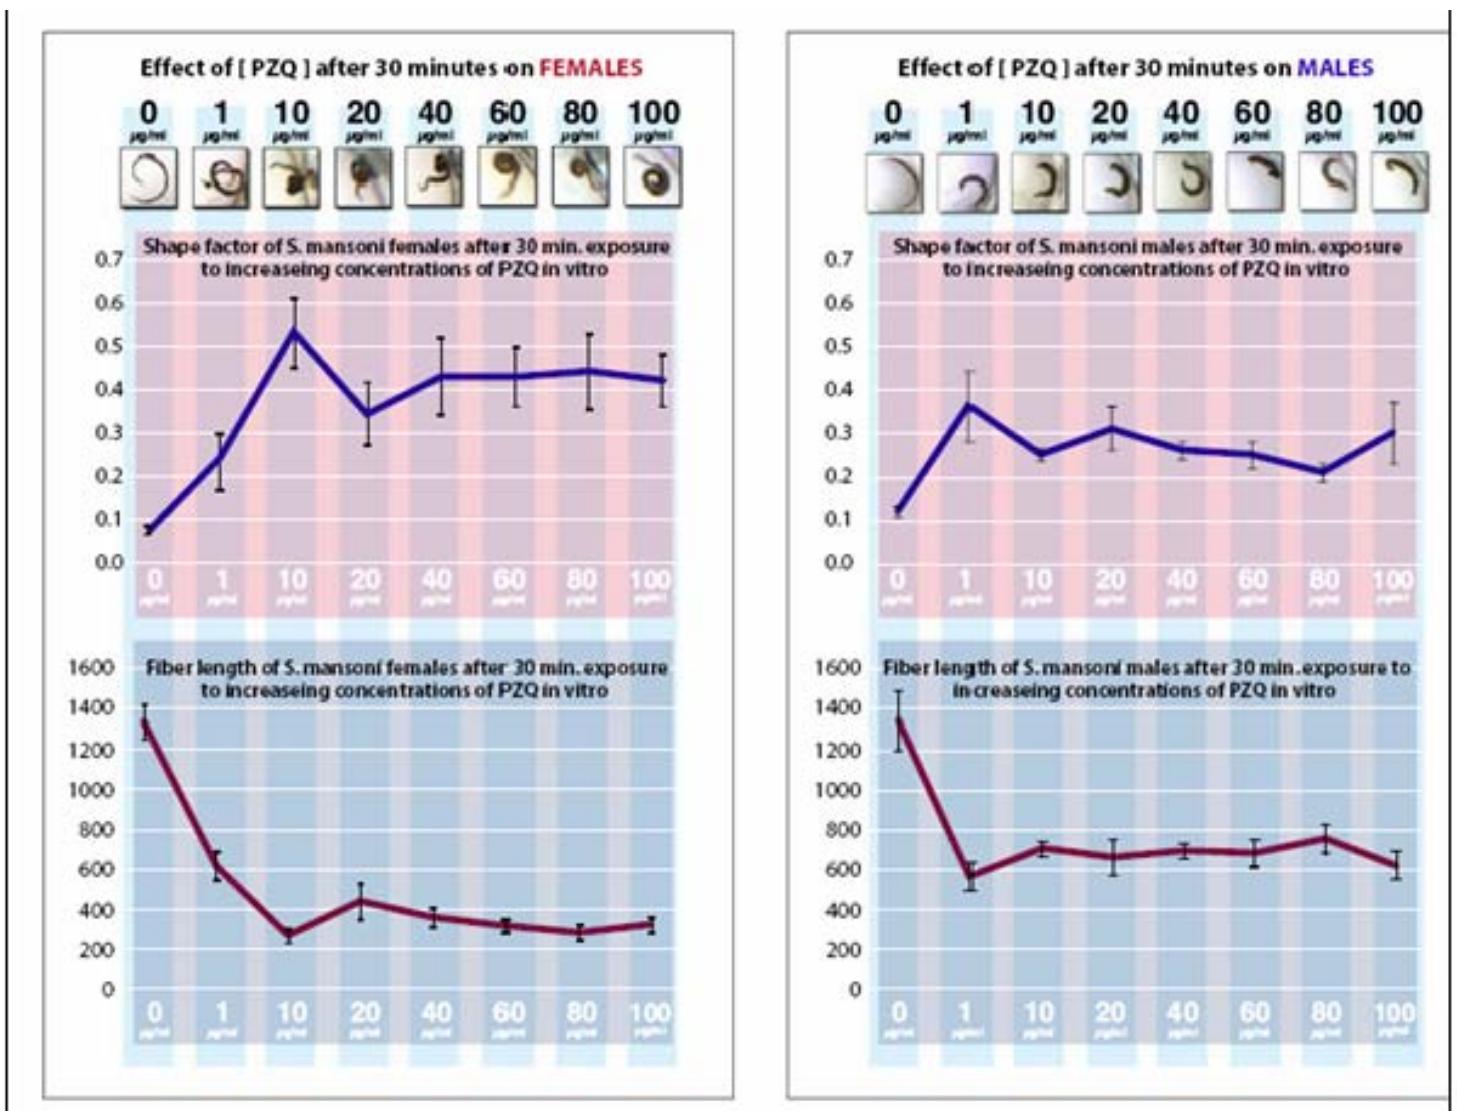

**Measurements of schistosomes after PZQ exposure.** Morphological appearance and measurements of shape factor and fiber length for male and female worms after exposure to increasing concentrations of PZQ for 30 min. Six-week-old worms were incubated in individual wells of a sterile 96 well-plate for 30 min at 37°C and 5% CO<sub>2</sub> in medium containing PZQ diluted to a final concentration of 0, 1, 10, 20, 40, 60, 80, and 100 µg/mL in 1% DMSO. Individual groups of 6 males and 6 females were each exposed to different concentration of the drug. At the end of the incubation period each worm was photographed using a Nikon Coolpix 4500 camera on a dissecting microscope. Pictures were processed with Metamorph v4.65 software to provide an indicator of “shape factor” - the degree of schistosome contraction was obtained by measuring the circularity and assigning a value of 0 to a linear and 1.0 to a completely circular schistosome. A second measurement of “fiber length,” which measures the internal length of the worm, was also estimated using this software.
