# Supplementary material
Source: PubMed Central journal article supplement (PMC2886009)
Supplement: NIHMS205208-supplement-Arrays_12.pdf [file NIHMS205208-supplement-Arrays_12.pdf]

**A**

**1<sup>st</sup> Biological replicate**

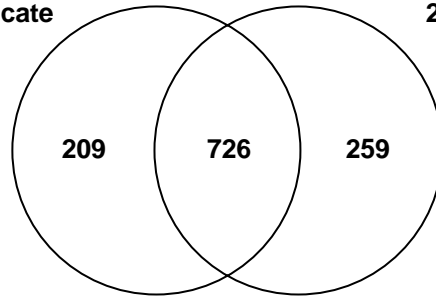

**2<sup>nd</sup> Biological replicate**

**B**

**1<sup>st</sup> Biological replicate**

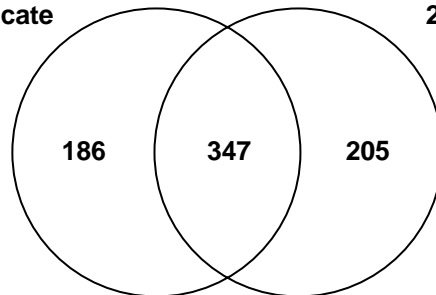

**2<sup>nd</sup> Biological replicate**
