# Supplementary material
Source: PubMed Central journal article supplement (PMC2886009)

Shown below is the structure of PZQ and the BODIPY derivative. I have hi-lighted the areas in blue that the analogs have in common with PZQ.

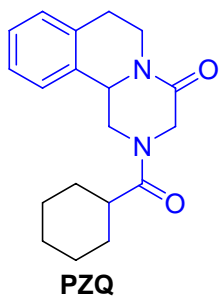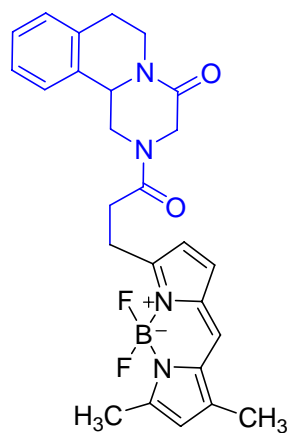

The synthesis of the BODIPY derivative is shown below:

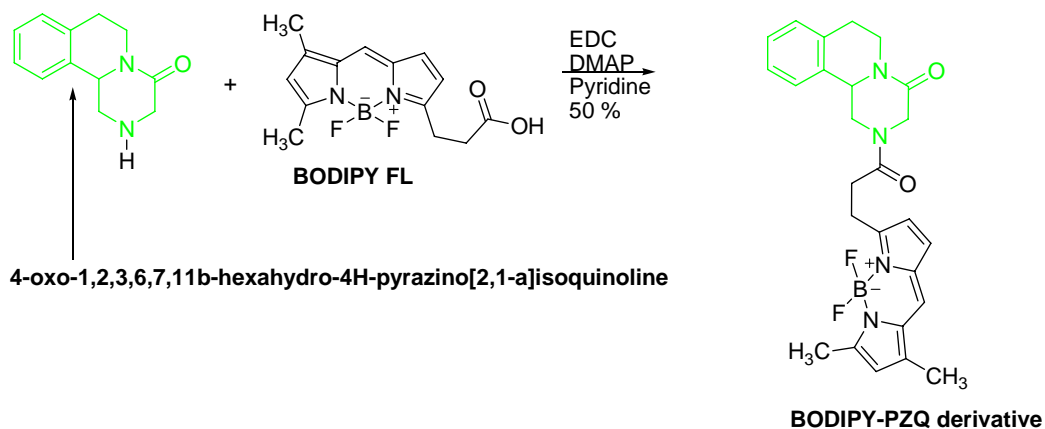

Supplement: NIHMS205208-supplement-Arrays_16.pdf [file NIHMS205208-supplement-Arrays_16.pdf]
