# Supplementary material
Source: PubMed Central journal article supplement (PMC2886009)

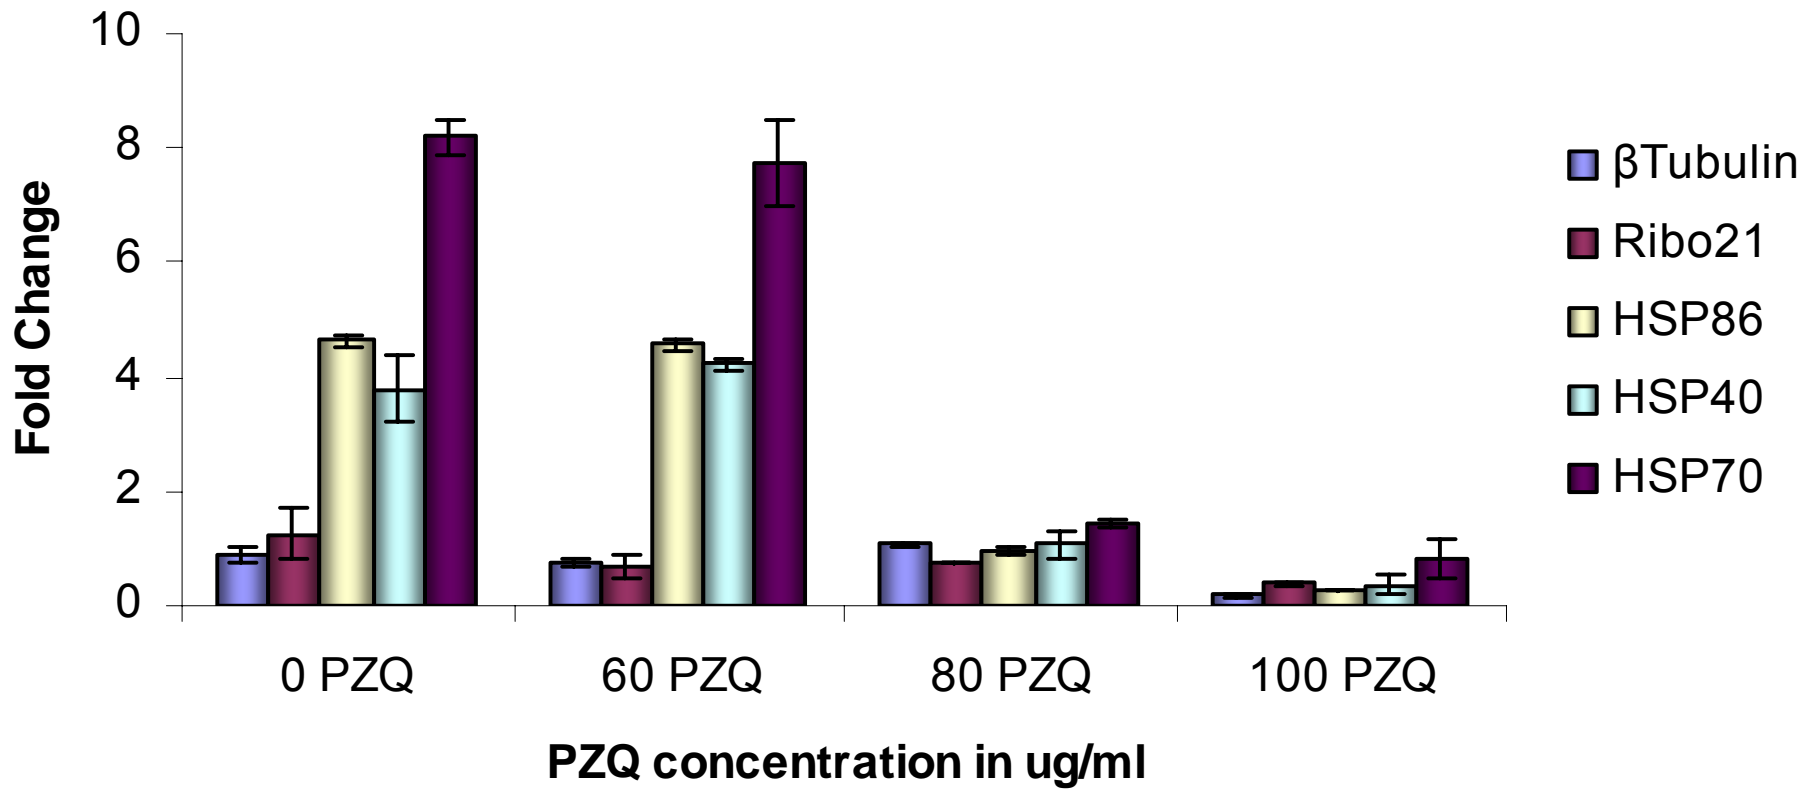

Supplement: NIHMS205208-supplement-Arrays_17.pdf [file NIHMS205208-supplement-Arrays_17.pdf]

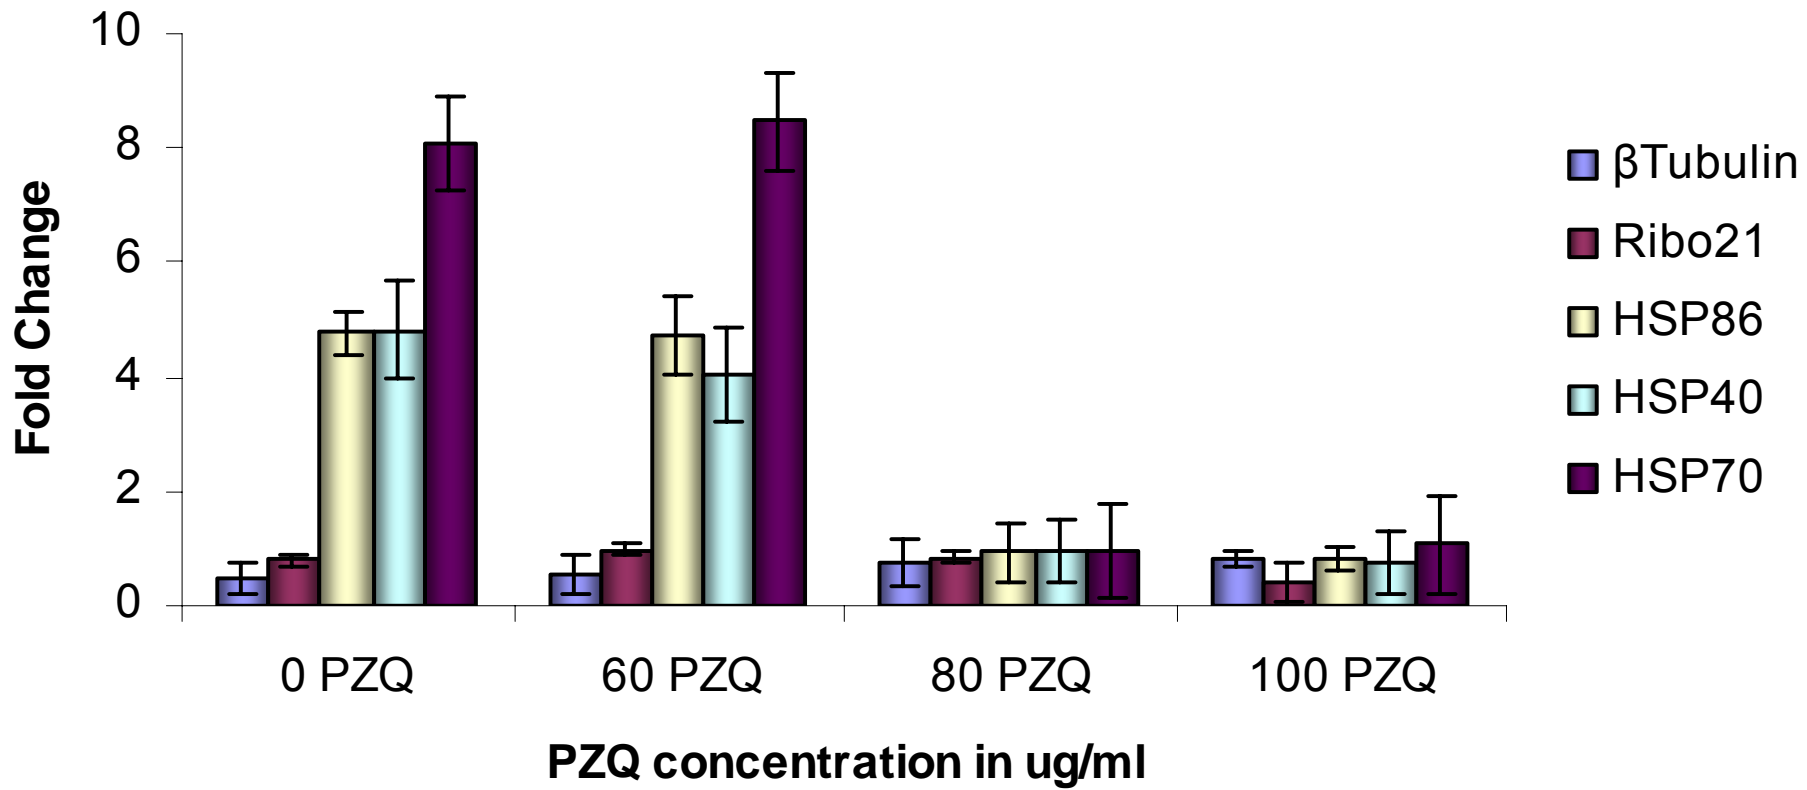

Supplement: NIHMS205208-supplement-Arrays_18.pdf [file NIHMS205208-supplement-Arrays_18.pdf]

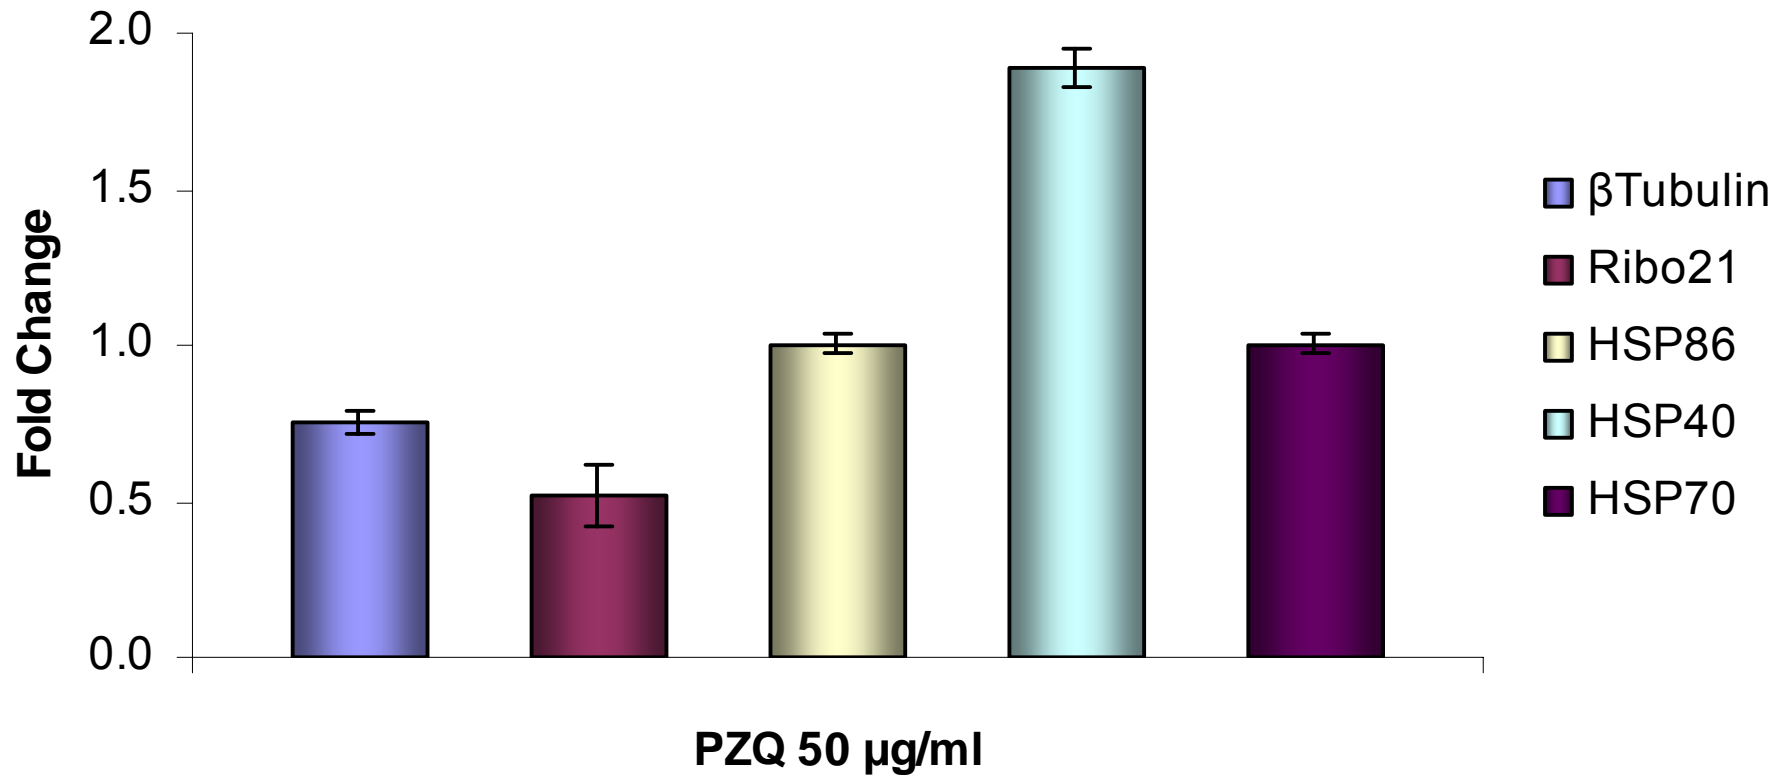

Supplement: NIHMS205208-supplement-Arrays_20.pdf [file NIHMS205208-supplement-Arrays_20.pdf]

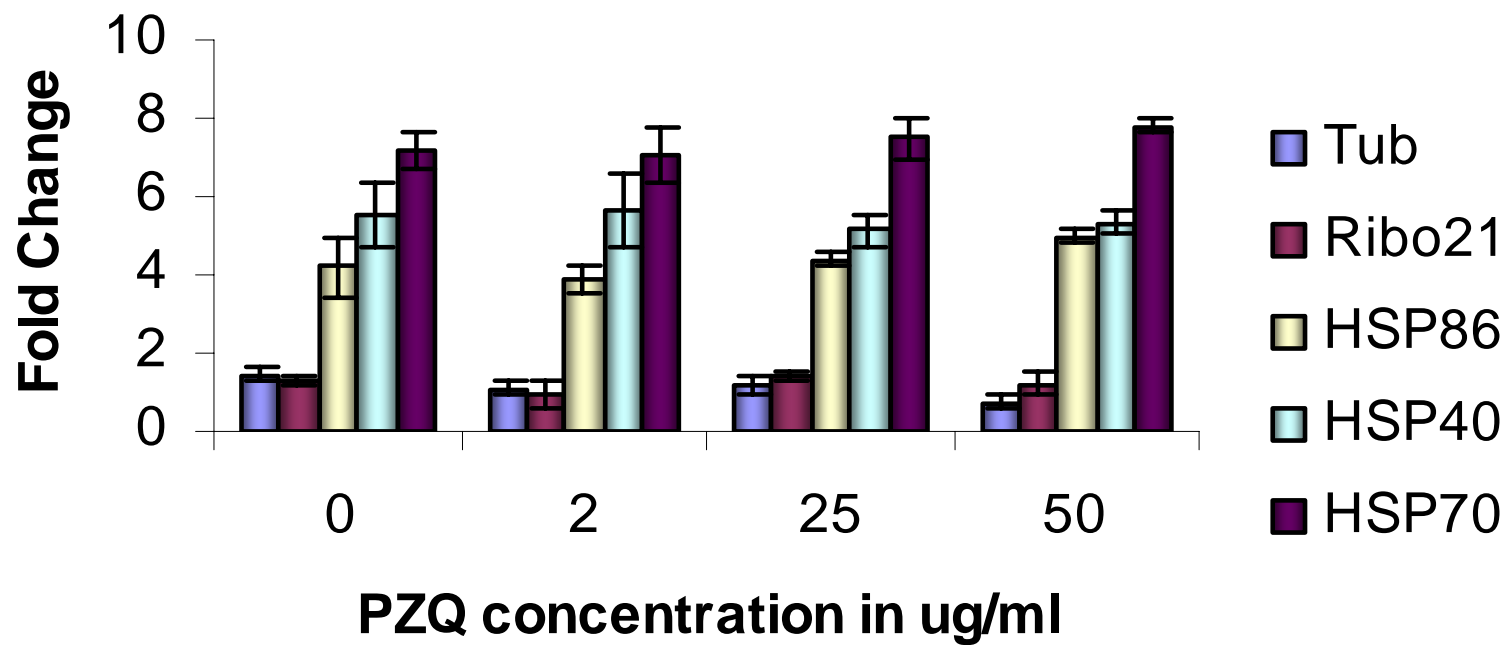

Supplement: NIHMS205208-supplement-Arrays_21.pdf [file NIHMS205208-supplement-Arrays_21.pdf]

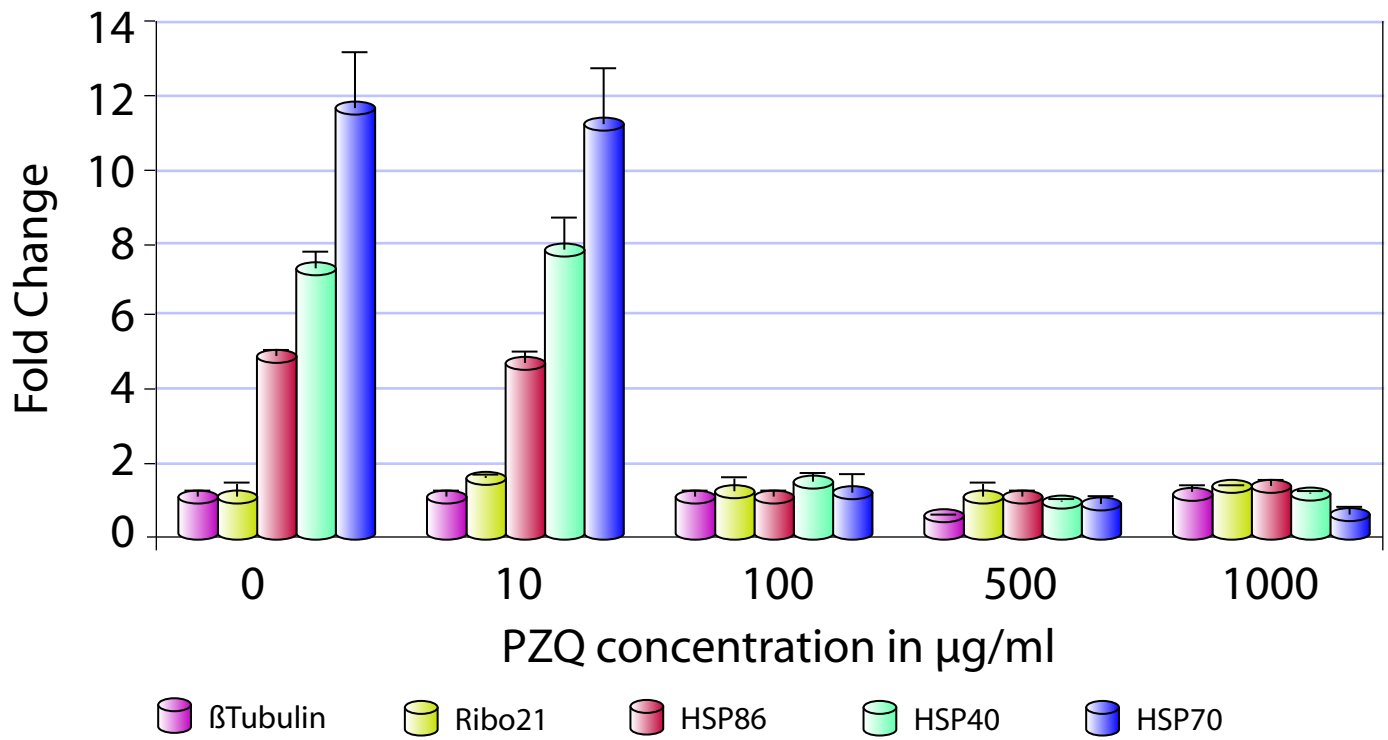

Supplement: NIHMS205208-supplement-Arrays_22.pdf [file NIHMS205208-supplement-Arrays_22.pdf]

**A.**

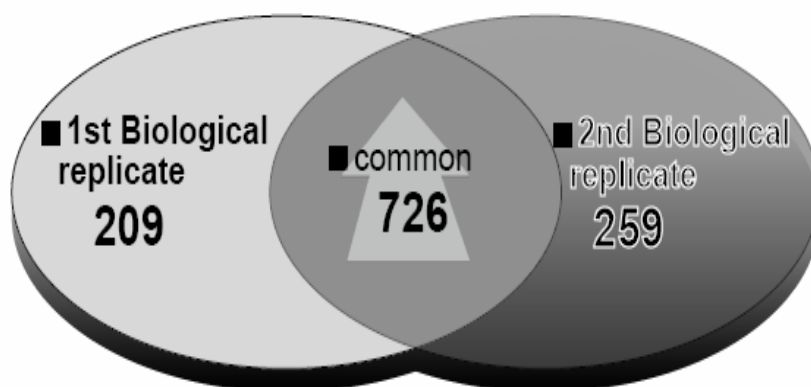

**B.**

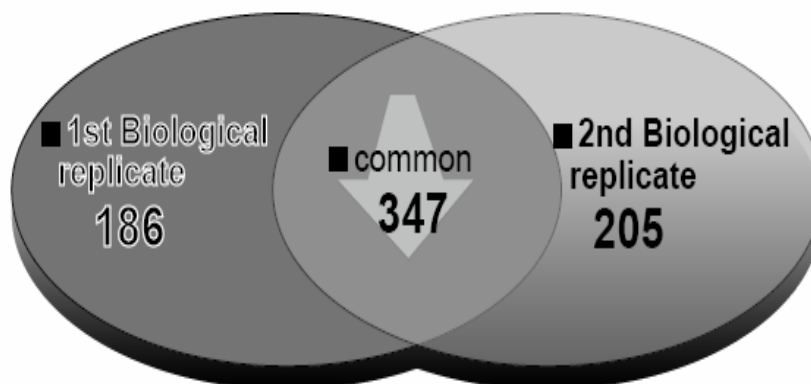

Supplement: NIHMS205208-supplement-Arrays_8.pdf [file NIHMS205208-supplement-Arrays_8.pdf]
